# Supplementary material for: Beta-Secretase-1 Antisense RNA Is Associated with Vascular Ageing and Atherosclerotic Cardiovascular Disease
Source: PubMed Central journal article supplement — Thromb Haemost. 2022 Sep 27;122(11):1932–42. doi: 10.1055/a-1914-2094 (PMC9626031; doi:10.1055/a-1914-2094), 2022-09-27
Supplement: 10-1055-a-1914-2094-s220133.pdf [file 10-1055-a-1914-2094-s220133.pdf]

# Supplementary Material

## Supplementary Methodology

### Cardiovascular Risk Factors' Definitions

Cardiovascular risk factors (CVRFs), including age >65 years, male gender, glomerular filtration rate (GFR) below 60 mL/min/1.73 m<sup>2</sup>, smoking, hypertension, hyperlipidemia, diabetes, obesity and increased high-sensitivity C-reactive protein (hs-CRP) (>2 mg/L)<sup>1</sup> were recorded for each participant and their sum was assessed as a measure of CVRF burden. Hypertension was defined as office blood pressure (BP) >140/90 mm Hg<sup>2</sup> or history of medical treatment with antihypertensive drugs. Diabetes mellitus (DM) was defined according to latest criteria as fasting plasma glucose ≥126 mg/dL<sup>3</sup> or intake of antidiabetic drugs. Hyperlipidemia was defined according to current guidelines by the lipid profile associated with the cardiovascular risk.<sup>4</sup> Smoking cessation was recorded as current or quit >6 months. GFR was estimated by the Modification of Diet in Renal Disease equation.

### Cardiovascular Risk Estimation

Patients were also classified into risk categories according to European Society of Cardiology (ESC) clinical criteria. In detail, ESC definition of very high risk patients includes the presence of any of the following: (1) documented cardiovas-

cular disease (CVD), clinical or unequivocal on imaging. Documented clinical CVD includes previous acute myocardial infarction, acute coronary syndrome (ACS), coronary revascularization and other arterial revascularization procedures, stroke and transient ischemic attack, aortic aneurysm, and peripheral artery disease. Unequivocally documented CVD on imaging includes plaque on coronary angiography or carotid ultrasound. (2) DM with target organ damage such as proteinuria or with a major risk factor such as smoking or marked hypercholesterolemia or marked hypertension. (3) Severe chronic kidney disease (CKD; GFR < 30 mL/min/1.73 m<sup>2</sup>). (4) A calculated SCORE ≥10%.<sup>5</sup>

ESC definition of high-risk patients includes the presence of any of the following: (1) Markedly elevated single risk factors, in particular cholesterol >8 mmol/L (>310 mg/dL) (e.g., in familial hypercholesterolemia) or BP ≥180/110 mm Hg; (2) most other people with DM (with the exception of young people with type 1 DM and without major risk factors that may be at low or moderate risk); (3) moderate CKD (GFR 30–59 mL/min/1.73 m<sup>2</sup>); (4) a calculated SCORE ≥5% and <10%.<sup>5</sup>

### Stable CAD and ACS Definition

Individuals were considered as stable CAD patients according to the following criteria: (1) patients who had undergone

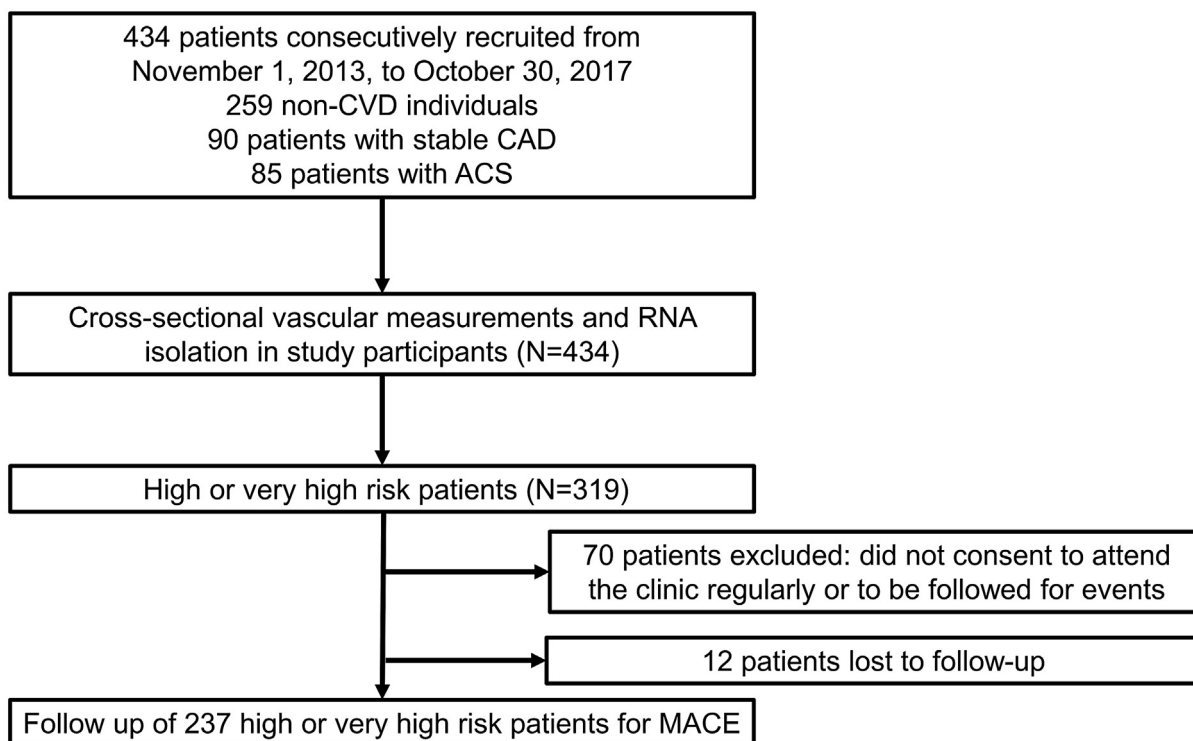

**Supplementary Fig. S1** Flowchart of the study population. ACS, acute coronary syndrome; CVD, cardiovascular disease; CAD, coronary artery disease, MACE, major adverse cardiovascular events.

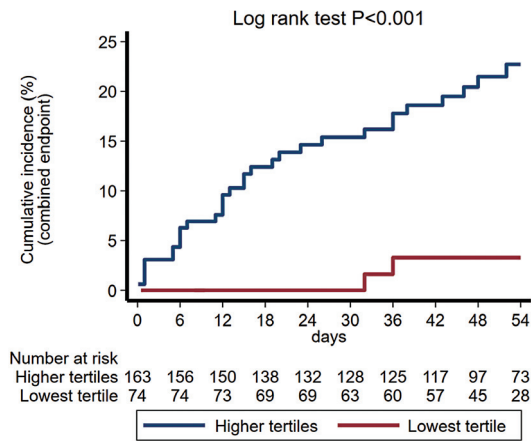

**Supplementary Fig. S2** Cumulative incidence of major adverse cardiovascular events (cardiovascular death, acute myocardial infarction, and revascularization procedure) in high/very high CVD risk patients (total  $N = 237$ ) according to *BACE1-AS* tertiles (lowest vs. higher), initially defined in the whole population. The number of patients at risk, during the follow-up period per *BACE1-AS* tertiles defined in the total population (lowest vs. higher), is depicted beneath the graph.  $p < 0.001$  by log-rank test of equality. HR = 2.42 per ascending tertile (95% CI: 1.39–4.22),  $p = 0.002$ , by Cox regression analysis. HR = 1.86 per ascending tertile (95% CI: 1.011–3.43),  $p = 0.046$ , after multi-variable adjustment for age, gender, presence of coronary artery disease, diabetes mellitus, and hypertension. CI, confidence interval; CVD, cardiovascular disease; HR, hazard ratio.

an elective coronary angiogram within the previous month, due to stable angina symptoms or chest pain not attributed to ACS or aortic syndrome, (2) previous history of ACS more than a year before baseline visit, and (3) documented presence of CAD by coronary angiogram or by stress imaging techniques.<sup>6</sup> A diseased coronary artery was defined as  $>50\%$  stenosis.<sup>6</sup> ACS was defined as increased high sensitivity cardiac troponin levels ( $>99$ th percentile) combined with at least one of the following: (1) symptoms of ischemia, (2) ECG abnormalities, i.e., ST-T segment alterations, left bundle branch block, or Q waves, (3) imaging evidence of new loss of viable myocardium or regional wall motion abnormality, and (4) intracoronary thrombus detected with coronary angiography or autopsy.<sup>7</sup>

### Vascular Methods

Peripheral vascular assessment was performed in all participants without clinically overt CVD and in patients with CAD (stable CAD or ACS). Aortic stiffness was assessed by aortic pulse wave velocity (PWV), an established marker of aortic elasticity.<sup>8–10</sup> The validated Complior device (Artech Medical), which allows the online pulse-wave recording and the automatic calculation of PWV, was used to assess PWV noninvasively. PWV values were derived from measurements of pulse transit time and the distance travelled

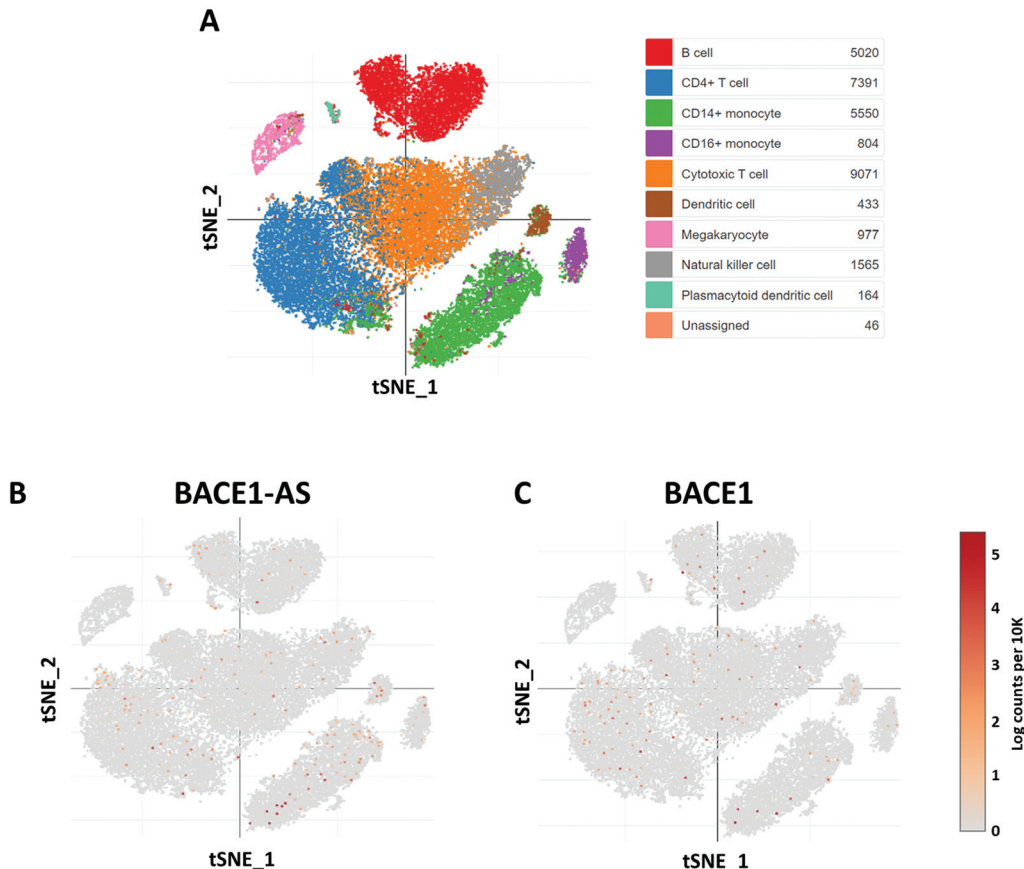

**Supplementary Fig. S3** t-Distributed stochastic neighbor embedding (tSNE) projections of *BACE1-AS* and *BACE1* gene expression in human PBMCs. (A) t-SNE plot of colored and labeled cell clusters showing their respective cell subtypes across PBMCs. (B, C) The gene expression of *BACE1-AS* and *BACE1* in PBMC subtypes. Each dot represents a single cell. Dots colored in red indicate the gene expression of which the warmer the color the higher the fold change in gene expression. PBMCs, peripheral blood mononuclear cells.

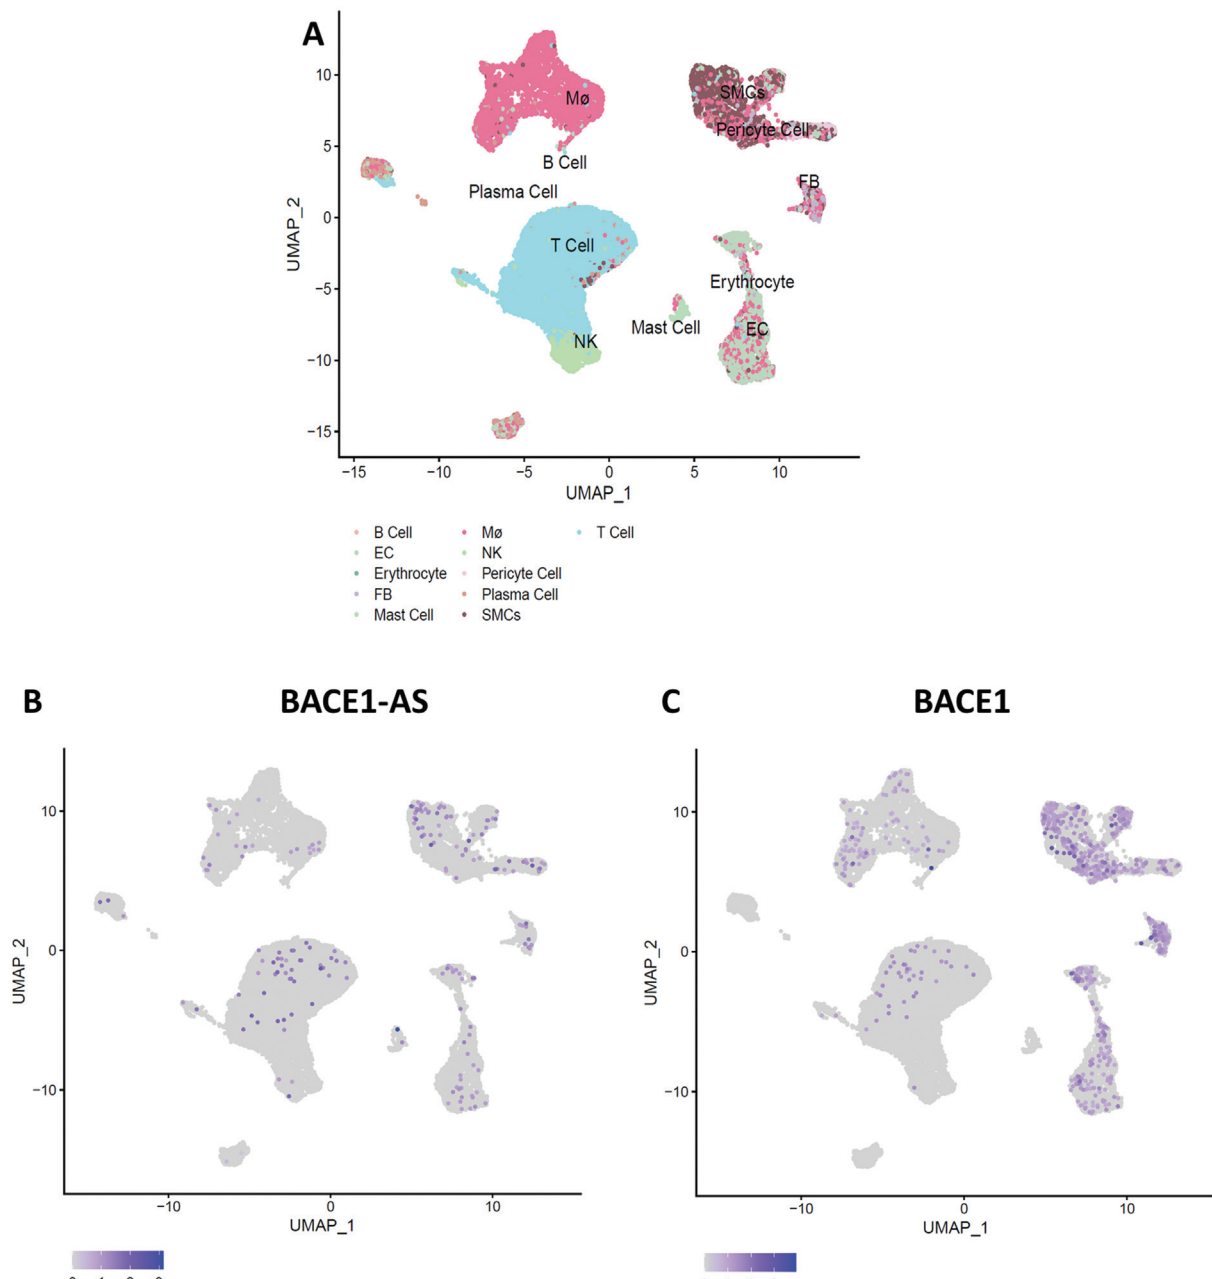

**Supplementary Fig. S4** Single-cell analysis results of *BACE1-AS* and *BACE1* gene expression in human atherosclerotic plaque. (A) UMAP plot of the proportion of diverse cell subtypes across atherosclerotic plaque with labels based on Seurat v4 using the *Tabula sapiens* reference. (B, C) UMAP plot showing the distribution of *BACE1-AS* and *BACE1* in atherosclerotic plaque different cell subtypes. Dot size depicts the fraction of cells expressing a gene. Dot color depicts the degree of expression of each gene. UMAP, uniform manifold approximation and projection for dimension reduction.

between two recording sites, and automatically calculated as follows:  $PWV = \text{distance [m]} / \text{transit time [s]}$ . In our study, PWV was measured between the common carotid artery and the common femoral artery and assessed twice (coefficient of variation: 2.4%). Reference values for PWV were used according to each subject's systolic BP and age, as previously described.<sup>11</sup>

High-resolution B-mode ultrasound imaging (14.0 MHz multifrequency linear array probe, Vivid 7 Pro, General Electric) was used to assess carotid and common femoral

artery atherosclerosis and to measure intima-media thickness (IMT) and atheromatous plaques.<sup>12</sup> IMT was measured between the intimal luminal and the medial adventitial interfaces of the carotid and femoral far wall, at the end-diastolic phase.<sup>13</sup> Atheromatous plaques were defined as a focal thickening that encroaches into the arterial lumen by 0.5 mm, or by 50% of the surrounding IMT, or sites where IMT is  $>1.5$  mm.<sup>12</sup> All scans were performed by a single experienced operator blinded to the cardiovascular profile of the patient.

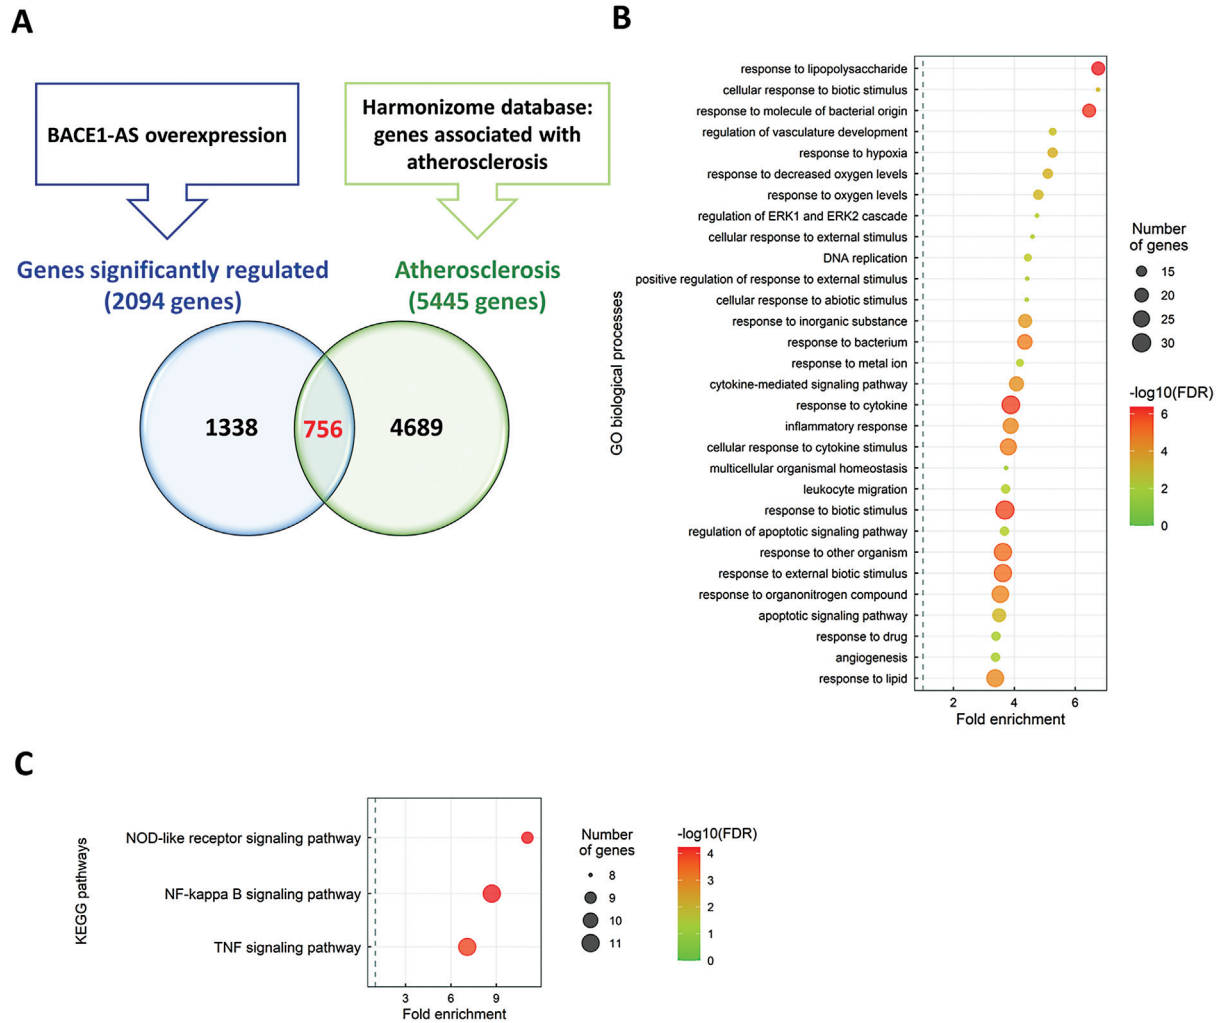

**Supplementary Fig. S5 Pipeline used to identify validated targets of *BACE1-AS* involved in atherosclerosis.** (A) We identified 2,094 genes significantly regulated with a corrected  $p$ -value of  $<0.05$  after *BACE1-AS* overexpression in human aortic endothelial cells, from which 756 are predicted to be involved in atherosclerosis according to the Harmonizome database (<https://maayanlab.cloud/Harmonizome/>). (B) Gene ontology analysis of the 756 atherosclerotic genes regulated by *BACE1-AS* overexpression (provided as input), using the web-based tool and applying the following criteria: GOTERM\_BP\_FAT as selected terms and displayed terms with  $>10$  counts in a functional annotation chart. (C) KEGG pathway enrichment analysis to explore the most enriched pathways among the 756 atherosclerotic genes regulated by *BACE1-AS* overexpression. The output pathways were filtered for false discovery rate (FDR)  $<0.05$  and fold enrichment  $>1.5$ . Subsequently, the pathways were sorted for increasing fold enrichment and plotted. In the plot, the size of each dot represents the number of genes from the input gene set included in each pathway while the color indicates the FDR value (as  $-\log_{10}(\text{FDR})$ ).

**Supplementary Table S1** Descriptive characteristics of high/very high CVD risk patients (N = 237) who were followed for events compared with high/very high-risk; CVD patients lost during follow-up (N = 12)

| Variable                                                        | N   | All              | Followed (N = 237) | Lost to follow-up (N = 12) | p-Value |
|-----------------------------------------------------------------|-----|------------------|--------------------|----------------------------|---------|
| Age (y)                                                         | 249 | 61.59 (10.03)    | 61.56 (10.13)      | 62.08 (8.16)               | 0.835   |
| Gender (male), n (%)                                            | 239 | 155 (64.85%)     | 146 (61.6%)        | 7 (58.3%)                  | 0.803   |
| Non-CVD, n (%)                                                  | 134 |                  | 128 (54%)          | 6 (50%)                    | 0.686   |
| Stable CAD, n (%)                                               | 56  |                  | 54 (22.8%)         | 2 (16.6%)                  | 0.699   |
| ACS, n (%)                                                      | 59  |                  | 55 (23.2%)         | 4 (33.3%)                  | 0.686   |
| BACE1-AS relative expression                                    | 249 | 0.00613 (0.0052) | 0.0061 (0.0052)    | 0.0071 (0.0057)            | 0.575   |
| BMI (kg/m <sup>2</sup> )                                        | 206 | 27.60 (4.34)     | 27.63 (4.34)       | 26.80 (3.67)               | 0.585   |
| SBP (mmHg)                                                      | 210 | 132.60 (20.109)  | 132.60 (20.34)     | 132.60 (15.53)             | 0.999   |
| DBP (mmHg)                                                      | 210 | 75.13 (10.68)    | 75.12 (10.50)      | 75.40 (14.50)              | 0.952   |
| Smoking, n (%)                                                  | 248 | 109 (43.6%)      | 104 (43.5%)        | 5 (41.66%)                 | 0.870   |
| Hypertension, n (%)                                             | 249 | 122 (48.8%)      | 116 (48.9%)        | 6 (50%)                    | 0.921   |
| Hyperlipidemia, n (%)                                           | 249 | 132 (52.8%)      | 126 (53.2%)        | 6 (50%)                    | 0.090   |
| Diabetes mellitus, n (%)                                        | 249 | 43 (19.4%)       | 40 (16.9%)         | 3 (25%)                    | 0.458   |
| Presence of carotid plaques, n (%)                              | 222 | 141 (54.9%)      | 132 (55.7%)        | 8 (66.67%)                 | 0.268   |
| Presence of any plaque, n (%)                                   | 220 | 167 (63.3%)      | 160 (67.5%)        | 7 (58.33%)                 | 0.919   |
| Presence of femoral plaques, n (%)                              | 221 | 122 (47.3%)      | 115 (48.5%)        | 6 (50%)                    | 0.528   |
| *GFR (mL/min)                                                   | 30  | 88.53 (34.23)    | 87.32 (33.20)      | 113.06 (45.18)             | 0.076   |
| *hs-CRP (mg/L)                                                  | 229 | 2.52 (11.94)     | 2.50 (12.16)       | 2.95 (4.40)                | 0.784   |
| *Pulse wave velocity (m/s)                                      | 177 | 10.15 (2.91)     | 10.13 (2.89)       | 10.58 (3.48)               | 0.731   |
| *Augmentation index (%)                                         | 166 | 27.61 (21.99)    | 27.51 (22.45)      | 29.75 (9.31)               | 0.561   |
| *Time of reflected waves (ms)                                   | 168 | 138.5 (11.03)    | 138.96 (9.82)      | 127.50 (16.66)             | 0.094   |
| * Common carotid artery IMT (mm)                                | 207 | 0.894 (0.173)    | 0.891 (0.172)      | 0.974 (0.183)              | 0.214   |
| *Carotid bulb IMT (mm)                                          | 184 | 1.026 (0.191)    | 1.027 (0.193)      | 1.01 (0.187)               | 0.872   |
| *Internal carotid IMT (mm)                                      | 187 | 0.843 (0.228)    | 0.844 (0.226)      | 0.817 (0.302)              | 0.810   |
| *Number of carotid plaques (IQR)                                | 227 | 1 (0-2)          | 1 (0-2)            | 1 (0-2)                    | 0.884   |
| *Total number of femoral and carotid segments with plaque (IQR) | 226 | 1 (0-3)          | 1(0-3)             | 3 (1-5)                    | 0.863   |
| *Number of diseased vascular beds (IQR)                         | 249 | 1 (1-3)          | 1 (1-3)            | 1(1-3)                     | 0.689   |

Abbreviations: ACS, acute coronary syndrome; BMI, body mass index; CAD, coronary artery disease; hs-CRP, high-sensitivity C-reactive protein; CVD, cardiovascular disease; DBP, diastolic blood pressure; GFR, glomerular filtration rate; IMT, intima-media thickness; IQR, interquartile range; SBP, systolic blood pressure.

Note: Diseased vascular beds were defined as: (1) carotid arteries with presence of plaque, (2) coronary arteries with presence of plaque with stenosis > 50%, (3) femoral arteries with presence of plaque. p-Value is derived from independent samples; Student's t-test or the non-parametric Mann-Whitney U test (\*) for continuous variables and the chi-squared test for nominal variables.

**Supplementary Table S2** Descriptive characteristics of high/very high CVD risk patients ( $N = 237$ ) who were followed for events according to *BACE1*-AS tertiles

| Variable                                                  | N   | All               | 1st tertile    | 2nd tertile   | 3rd tertile    | p-Value |
|-----------------------------------------------------------|-----|-------------------|----------------|---------------|----------------|---------|
| Age (y)                                                   | 236 | 61.6 (11.2)       | 59.4(9.9)      | 64 (10.9)     | 61.3 (9.1)     | 0.012   |
| Gender (male), n (%)                                      | 237 | 146 (61.6%)       | 47 (59.5)      | 47 (59.5%)    | 52 (65.8%)     | 0.640   |
| Non-CVD, n (%)                                            | 128 | 128 (54%)         | 59 (74.7%)     | 34 (43%)      | 35 (44.3%)     | <0.001  |
| Stable CAD, n (%)                                         | 54  | 54 (22.8%)        | 9 (11.4%)      | 26 (32.9%)    | 19 (24.1%)     | <0.001  |
| ACS, n (%)                                                | 55  | 55 (23.2%)        | 11 (13.9%)     | 19 (24.1%)    | 25 (31.6%)     | <0.001  |
| BMI (kg/m <sup>2</sup> )                                  | 195 | 27.66 (4.36)      | 28.15 (4.62)   | 27.14 (4.01)  | 27.56 (4.34)   | 0.495   |
| SBP (mmHg)                                                | 198 | 132.58 (20.28)    | 134.36 (19.89) | 130.25 (20.6) | 132.81 (20.86) | 0.563   |
| DBP (mmHg)                                                | 198 | 75.08 (10.46)     | 74.99 (10.40)  | 74.05 (9.77)  | 76.07 (11.16)  | 0.598   |
| Smoking, n (%)                                            | 234 | 103 (44%)         | 29 (36.7%)     | 31 (40.3%)    | 43 (55.1%)     | 0.048   |
| Hypertension, n (%)                                       | 237 | 116 (48.9%)       | 31(39.2%)      | 46 (58.2%)    | 39 (49.4%)     | 0.058   |
| Hyperlipidemia (%)                                        | 237 | 126 (53.2%)       | 32 (40.5%)     | 46 (58.2%)    | 48 (60.8%)     | 0.039   |
| Diabetes mellitus, n (%)                                  | 237 | 40 (16.9%)        | 11 (27.5%)     | 15 (19%)      | 14 (17.7%)     | 0.676   |
| Presence of carotid plaques, n (%)                        | 210 | 132 (62.9%)       | 46 (64.8%)     | 42 (57.5%)    | 44 (66.7%)     | 0.494   |
| Presence of any plaque, n (%)                             | 209 | 212 (56.68%)      | 56 (78.9%)     | 54 (74.0%)    | 50 (76.9%)     | 0.783   |
| Presence of femoral plaques (%)                           | 209 | 115 (55%)         | 38 (53.5%)     | 37 (51.4%)    | 40 (60.6%)     | 0.527   |
| *GFR (mL/min)                                             | 230 | 87.28 (33.34)     | 94.83 (33.19)  | 78.99 (32.29) | 85.80 (32.97)  | 0.008   |
| *hs-CRP (mg/L)                                            | 217 | 0.23 (0.08–0.875) | 3.26 (18.95)   | 1.61 (4.80)   | 2.67 (8.35)    | 0.110   |
| *Pulse wave velocity (m/s)                                | 167 | 10.12 (2.88)      | 9.51 (2.49)    | 10.46 (2.90)  | 10.49 (3.19)   | 0.086   |
| *Augmentation index (%)                                   | 156 | 27.58 (22.57)     | 25.17 (8.02)   | 32.48 (41.34) | 26.42 (8.12)   | 0.694   |
| *Time of return of reflected waves (ms)                   | 158 | 140 (133–146)     | 141.54 (8.72)  | 138.26 (9.61) | 136.38 (10.35) | 0.011   |
| *Common carotid artery IMT (mm)                           | 196 | 0.89 (0.172)      | 0.87(0.18)     | 0.89 (0.17)   | 0.91 (0.17)    | 0.480   |
| *Total number of femoral and carotid segments with plaque | 214 | 1 (0–2)           | 0 (0–2)        | 1 (0–3)       | 1 (0–3)        | 0.770   |
| *Number of diseased vascular beds                         | 237 | 1 (0–2)           | 1 (0–2)        | 1 (1–3)       | 1 (1–3)        | 0.732   |

Abbreviations: BMI, body mass index; hs-CRP, high-sensitivity C-reactive protein; DBP, diastolic blood pressure; GFR, glomerular filtration rate; IMT, intima-media thickness; SBP, systolic blood pressure.

Note: p-Value is derived from analysis of variance or the nonparametric Kruskal–Wallis rank test (\*) for continuous variables and the chi-squared test for nominal variables. Diseased vascular beds were defined as: (1) carotid arteries with presence of plaque, (2) coronary arteries with presence of plaque with stenosis >50%, (3) femoral arteries with presence of plaque.

**Supplementary Table S3** Literature curation regarding the proatherosclerotic role of *BACE1* and *BACE1*-AS

| Experimental model                                                              | Study finding                                                                                      | Source |
|---------------------------------------------------------------------------------|----------------------------------------------------------------------------------------------------|--------|
| <i>BACE1</i> repression                                                         |                                                                                                    |        |
| <i>BACE1</i> <sup>-/-</sup> mice fed with high-fat diet                         | Lower levels of circulating LDL and TGs<br>Reduction of atherosclerotic plaque                     | 14     |
| <i>BACE1</i> <sup>-/-</sup> macrophages                                         | Decrease number of lipid droplets in the foam cells                                                | 14     |
| <i>BACE1</i> <sup>-/-</sup> mice (serum)                                        | Increase anti-inflammatory IL-9 production                                                         | 15     |
| Human monocyte cell line treated with <i>BACE1</i> inhibitor                    | Reduce binding to VCAM-1<br><i>BACE1</i> is markedly upregulated during macrophage differentiation | 16     |
| <i>BACE1</i> <sup>-/-</sup> mice                                                | Reduced IL-17A expression in <i>BACE1</i> <sup>-/-</sup> T cells                                   | 17     |
| <i>BACE1</i> overexpression                                                     |                                                                                                    |        |
| Endothelial-specific <i>BACE1</i> overexpression mice                           | Tight junction disruptions and endothelial dysfunction                                             | 18     |
| EA.hy926 endothelial cells treated with <i>BACE1</i> -overexpressing lentivirus | Increased endothelial cell tight junction disruption<br>Increased monocyte adhesion                | 19     |
| <i>BACE1</i> -AS repression                                                     |                                                                                                    |        |
| SH-SY5Y cells treated with <i>BACE1</i> -AS siRNA                               | Reduction of TNF- $\alpha$ , IL-6, IL-1 $\beta$ levels, and ROS production                         | 20     |

Abbreviations: *BACE1*, beta-secretase-1; IL, interleukin; KO, knockout; LDL, low-density lipoprotein; NF $\kappa$ B, nuclear factor kappa B; TGs, triglycerides; TNF, tumor necrosis factor; TNFR1, tumor necrosis factor receptor-1.

**Supplementary Table S4** Experimental and clinical data suggesting the involvement of *BACE1-AS* in the pathophysiology of multiple human diseases

| Involvement of <i>BACE1-AS</i> in human disease           |                                                                  |                                                                                                                                   |                                                                 |                                                                                          |                                                                                                                                                                           |            |
|-----------------------------------------------------------|------------------------------------------------------------------|-----------------------------------------------------------------------------------------------------------------------------------|-----------------------------------------------------------------|------------------------------------------------------------------------------------------|---------------------------------------------------------------------------------------------------------------------------------------------------------------------------|------------|
| Disease                                                   | Target pathway                                                   | Function of pathway                                                                                                               | Clinical relevance                                              | Setting of association (animal experiment, cells, patients)                              | Effect of <i>BACE1-AS</i> on the target                                                                                                                                   | References |
| Alzheimer's disease                                       | miR-29, miR-107, miR-124, miR-485 miR-761/ <i>BACE</i> mRNA axis | miRNAs bind to <i>BACE</i> mRNA and suppress its translation                                                                      |                                                                 | SH-SY5Y cell<br>HEK293 T cells<br>PP/PS1 transgenic mice                                 | <i>BACE1-AS</i> sponges miR-124 miR-29, miR-107, miR-124, miR-485 miR-761                                                                                                 | 21         |
| Alzheimer's disease                                       | miR-214-3p/ <i>ATG5</i> axis in AD.                              | miR-214-3p/ <i>ATG5</i> axis regulates neuronal cell autophagy                                                                    | Elevated circulating <i>BACE1-AS</i> could serve as a biomarker | Serum samples of AD patients, brain tissues of AD transgenic (Tg) mice and SH-SY5Y cells | <i>BACE1-AS</i> sponges miR-214-3p and promotes autophagy in vivo.                                                                                                        | 22,23      |
| Alzheimer's disease                                       | miR-132-3p                                                       | Mitigates amyloid-induced neuronal toxicity                                                                                       |                                                                 | HEK293T cells<br>SK-N-SH cells                                                           | <i>BACE1-AS</i> increased the amyloid-induced damage by sponging miR-132-3p                                                                                               | 24         |
| Parkinson's disease                                       | miR34-b                                                          | miR34-b binds <i>BACE1</i> mRNA and decreases <i>BACE1</i> expression                                                             |                                                                 | Substantia nigra tissue from Parkinson's disease mouse model                             | <i>BACE1-AS</i> sequesters miR34-b<br><i>BACE1-AS</i> promotes <i>BACE1</i> expression by directly stabilizing <i>BACE1</i> mRNA and, indirectly, by sequestering miR34-b | 25         |
| Ovarian cancer                                            | Unknown                                                          | Anisomycin treatment increases <i>BACE1-AS</i> and <i>BACE1</i>                                                                   | Amyloid-induced cytotoxicity within the tumor                   | Human ovarian cancer stem cells                                                          | <i>BACE1-AS</i> stabilizes <i>BACE1</i> mRNA and thus promotes amyloid formation                                                                                          | 26         |
| Hepatocellular carcinoma (HCC)                            | miR-377-3p/ <i>CELF1</i> axis                                    | miR-377-3p inhibits HCC cell migration and invasion. <i>CELF1</i> is an oncogene in HCC cells and is downregulated by miR-377-3p. | <i>BACE1-AS</i> could be a potential biomarker in HCC           | HCC tumor tissues and cells                                                              | <i>BACE1-AS</i> downregulates miR-377-3p and promotes tumor invasion and metastasis.                                                                                      | 27,28      |
| Sporadic inclusion-body myositis                          | Unknown                                                          | <i>BACE1-AS</i> increases in response to endoplasmic reticulum stress                                                             |                                                                 | Muscle tissue biopsy                                                                     | <i>BACE1-AS</i> promotes A $\beta$ formation in muscle tissue                                                                                                             | 29         |
| Chronic inflammatory demyelinating polyradiculoneuropathy |                                                                  | Possible role of <i>BACE1/BACE1-AS</i> in immune response                                                                         | <i>BACE1-AS</i> could serve as a biomarker                      | Peripheral blood                                                                         |                                                                                                                                                                           | 30         |

Abbreviations: *BACE1-AS*,  $\beta$ -secretase 1 anti-sense RNA; miR, microRNA; HAND, HIV-associated neurocognitive disorder; mRNA, messenger RNA.

**Supplementary Table S5** Cardioprotective role of miRNAs sponged by *BACE1-AS*

| microRNA | Methodology                                                                                                 | Association with CVD                                                                                                                                                                                                                               |
|----------|-------------------------------------------------------------------------------------------------------------|----------------------------------------------------------------------------------------------------------------------------------------------------------------------------------------------------------------------------------------------------|
| miR29    | ACS, atrial fibrillation, and heart failure patients.                                                       | Downregulated in ACS, Afib, and HF patients. <sup>31–33</sup>                                                                                                                                                                                      |
| miR34b   | VSMCs of spontaneously hypertensive rats, VSMCs from C57/BL mice.                                           | Regulates VSMC proliferation by suppressing CDK6. miR-34b modulates VSMC calcification by directly targeting Notch1. <sup>34,35</sup>                                                                                                              |
| miR107   | Vascular endothelial cells of SPF Kunming mice, blood cells from patients with atherosclerosis.             | Upregulation of miR-107 protects against inflammation in coronary atherosclerosis. Downregulated in patients with atherosclerosis, inhibits proliferation of HUVECs and HUVSMCs. <sup>36,37</sup>                                                  |
| miR124   | CAD patients, PAD patients, ApoE <sup>-/-</sup> , C57B/L6J mice, macrophages from ApoE <sup>-/-</sup> mice. | Downregulated in CAD patients, negatively associated with severity of PAD. miR-124 inhibits inflammatory responses during atherosclerosis development. Suppresses p38MAPK signaling pathway, inhibiting macrophage proliferation. <sup>38–41</sup> |
| miR132   |                                                                                                             | Conflicting data. <sup>41–48</sup>                                                                                                                                                                                                                 |
| miR214   | CAD patients, in vitro myocardial cells.                                                                    | Decreased in CAD, UA, and AMI patients. Exerts cardioprotective properties in MI-induced cardiac injury. <sup>49,50</sup>                                                                                                                          |
| miR377   | Human VSMCs.                                                                                                | Inhibits VSMC proliferation. <sup>51</sup>                                                                                                                                                                                                         |
| miR485   | CAD patients, in vitro myocardial cells.                                                                    | Increased circulating miR485 in CAD patients. Inhibits cell autophagy and apoptosis of myocardial cells in vitro. <sup>52,53</sup>                                                                                                                 |
| miR761   | Macrophages incubated with ox-LDL, rat aortic VSMCs.                                                        | Reduces IL-1 $\beta$ and IL-18 secretion in macrophages. miR-761 suppresses Ang-II-induced cell cycle progression and subsequent proliferation of VSMCs by inhibiting mTOR signaling pathway. <sup>54,55</sup>                                     |

Abbreviations: ACS, acute coronary syndrome; Afib, atrial fibrillation; AMI, acute myocardial infarction; AngII, angiotensin-II; ApoE, apolipoprotein-E; *BACE1-AS*,  $\beta$ -secretase 1 antisense RNA; CAD, coronary artery disease; CDK6, cyclin-dependent kinase-6; CVD, cardiovascular disease; HF, heart failure; HUVECs, human umbilical vein endothelial cells; HUVSMCs, human umbilical vein smooth muscle cells; IL, interleukin; miR, microRNA; ox-LDL, oxidized low-density lipoprotein; PAD, peripheral artery disease; UA, unstable angina; VSMCs, vascular smooth muscle cells.

### Conflict of Interest

The authors declare that there is no conflict of interest.

### References

- 1 Yousuf O, Mohanty BD, Martin SS, et al. High-sensitivity C-reactive protein and cardiovascular disease: a resolute belief or an elusive link? *J Am Coll Cardiol* 2013;62(05):397–408
- 2 Williams B, Mancia G, Spiering W, et al; ESC Scientific Document Group. 2018 ESC/ESH guidelines for the management of arterial hypertension. *Eur Heart J* 2018;39(33):3021–3104
- 3 American Diabetes Association. 2. Classification and diagnosis of diabetes: *Standards of Medical Care in Diabetes-2020*. *Diabetes Care* 2020;43(Suppl 1):S14–S31
- 4 Mach F, Baigent C, Catapano AL, et al; ESC Scientific Document Group. 2019 ESC/EAS guidelines for the management of dyslipidaemias: lipid modification to reduce cardiovascular risk. *Eur Heart J* 2020;41(01):111–188
- 5 Piepoli MF, Hoes AW, Agewall S, et al; ESC Scientific Document Group. 2016 European guidelines on cardiovascular disease prevention in clinical practice: The Sixth Joint Task Force of the European Society of Cardiology and Other Societies on Cardiovascular Disease Prevention in Clinical Practice (constituted by representatives of 10 societies and by invited experts) Developed with the special contribution of the European Association for Cardiovascular Prevention & Rehabilitation (EACPR). *Eur Heart J* 2016;37(29):2315–2381
- 6 Knuuti J, Wijns W, Saraste A, et al; ESC Scientific Document Group. 2019 ESC guidelines for the diagnosis and management of chronic coronary syndromes. *Eur Heart J* 2020;41(03):407–477
- 7 Thygesen K, Alpert JS, Jaffe AS, et al; Executive Group on behalf of the Joint European Society of Cardiology (ESC)/American College of Cardiology (ACC)/American Heart Association (AHA)/World Heart Federation (WHF) Task Force for the Universal Definition of Myocardial Infarction. Fourth universal definition of myocardial infarction (2018). *J Am Coll Cardiol* 2018;72(18):2231–2264
- 8 Williams B, Lacy PS, Thom SM, et al; CAFE Investigators Anglo-Scandinavian Cardiac Outcomes Trial Investigators CAFE Steering Committee and Writing Committee. Differential impact of blood pressure-lowering drugs on central arterial pressure and clinical outcomes: principal results of the Conduit Artery Function Evaluation (CAFE) study. *Circulation* 2006;113(09):1213–1225
- 9 Niiranen TJ, Kalesan B, Larson MG, et al. Aortic-brachial arterial stiffness gradient and cardiovascular risk in the community: the Framingham Heart Study. *Hypertension* 2017;69(06):1022–1028
- 10 Cohn JN, Quyyumi AA, Hollenberg NK, Jamerson KA. Surrogate markers for cardiovascular disease: functional markers. *Circulation* 2004;109(25, Suppl 1):IV31–IV46
- 11 Townsend RR, Wilkinson IB, Schiffrin EL, et al; American Heart Association Council on Hypertension. Recommendations for improving and standardizing vascular research on arterial stiffness: a scientific statement from the American Heart Association. *Hypertension* 2015;66(03):698–722
- 12 Touboul PJ, Hennerici MG, Meairs S, et al. Mannheim carotid intima-media thickness and plaque consensus (2004–2006-



- 2011). An update on behalf of the advisory board of the 3rd, 4th and 5th watching the risk symposia, at the 13th, 15th and 20th European Stroke Conferences, Mannheim, Germany, 2004, Brussels, Belgium, 2006, and Hamburg, Germany, 2011. *Cerebrovasc Dis* 2012;34(04):290–296
- 13 Nambi V, Chambless L, Folsom AR, et al. Carotid intima-media thickness and presence or absence of plaque improves prediction of coronary heart disease risk: the ARIC (Atherosclerosis Risk In Communities) study. *J Am Coll Cardiol* 2010;55(15):1600–1607
  - 14 Chen L, Huang Y, Guo J, Li Y. Expression of Bace1 is positive with the progress of atherosclerosis and formation of foam cell. *Biochem Biophys Res Commun* 2020;528(03):440–446
  - 15 Stertz L, Contreras-Shannon V, Monroy-Jaramillo N, Sun J, Walss-Bass C. BACE1-deficient mice exhibit alterations in immune system pathways. *Mol Neurobiol* 2018;55(01):709–717
  - 16 Woodard-Grice AV, McBrayer AC, Wakefield JK, Zhuo Y, Bellis SL. Proteolytic shedding of ST6Gal-I by BACE1 regulates the glycosylation and function of alpha4beta1 integrins. *J Biol Chem* 2008;283(39):26364–26373
  - 17 Hernandez-Mir G, Raphael I, Revu S, et al. The Alzheimer's disease-associated protein BACE1 modulates T cell activation and Th17 function. *J Immunol* 2019;203(03):665–675
  - 18 Zhou H, Gao F, Yang X, et al. Endothelial BACE1 impairs cerebral small vessels via tight junctions and eNOS. *Circ Res* 2022;130(09):1321–1341
  - 19 Deng X, Zhang J, Liu Y, Chen L, Yu C. TNF- $\alpha$  regulates the proteolytic degradation of ST6Gal-1 and endothelial cell-cell junctions through upregulating expression of BACE1. *Sci Rep* 2017;7:40256
  - 20 Li L, Wang H, Li H, Lu X, Gao Y, Guo X. Long noncoding RNA BACE1-antisense transcript plays a critical role in Parkinson's disease via microRNA-214-3p/Cell death-inducing p53-target protein 1 axis. *Bioengineered* 2022;13(04):10889–10901
  - 21 Zeng T, Ni H, Yu Y, et al. BACE1-AS prevents BACE1 mRNA degradation through the sequestration of BACE1-targeting miRNAs. *J Chem Neuroanat* 2019;98:87–96
  - 22 Zhou Y, Ge Y, Liu Q, et al. LncRNA BACE1-AS promotes autophagy-mediated neuronal damage through the miR-214-3p/ATG5 signalling axis in Alzheimer's disease. *Neuroscience* 2021;455:52–64
  - 23 Wang J, Wang WN, Xu SB, et al. MicroRNA-214-3p: a link between autophagy and endothelial cell dysfunction in atherosclerosis. *Acta Physiol (Oxf)* 2018;222(03):
  - 24 Ge Y, Song X, Liu J, Liu C, Xu C. The combined therapy of berberine treatment with lncRNA BACE1-AS depletion attenuates A $\beta$ <sub>25-35</sub> induced neuronal injury through regulating the expression of miR-132-3p in neuronal cells. *Neurochem Res* 2020;45(04):741–751
  - 25 Li Y, Fang J, Zhou Z, et al. Downregulation of lncRNA BACE1-AS improves dopamine-dependent oxidative stress in rats with Parkinson's disease by upregulating microRNA-34b-5p and downregulating BACE1. *Cell Cycle* 2020;19(10):1158–1171
  - 26 Chen Q, Liu X, Xu L, et al. Long non-coding RNA BACE1-AS is a novel target for anisomycin-mediated suppression of ovarian cancer stem cell proliferation and invasion. *Oncol Rep* 2016;35(04):1916–1924
  - 27 Liu C, Wang H, Tang L, et al. LncRNA BACE1-AS enhances the invasive and metastatic capacity of hepatocellular carcinoma cells through mediating miR-377-3p/CELF1 axis. *Life Sci* 2021;275:119288
  - 28 Nie Y, Li Y, Xu Y, Jiao Y, Li W. Long non-coding RNA BACE1-AS is an independent unfavorable prognostic factor in liver cancer. *Oncol Lett* 2020;20(05):202
  - 29 Nogalska A, Engel WK, Askanas V. Increased BACE1 mRNA and noncoding BACE1-antisense transcript in sporadic inclusion-body myositis muscle fibers—possibly caused by endoplasmic reticulum stress. *Neurosci Lett* 2010;474(03):140–143
  - 30 Ghafouri-Fard S, Mazdeh M, Nicknafs F, Nazer N, Sayad A, Taheri M. Expression analysis of BDNF, BACE1 and their antisense transcripts in inflammatory demyelinating polyradiculoneuropathy. *Mult Scler Relat Disord* 2021;47:102613
  - 31 Dawson K, Wakili R, Ordög B, et al. MicroRNA29: a mechanistic contributor and potential biomarker in atrial fibrillation. *Circulation* 2013;127(14):1466–1475, 1475e1–28
  - 32 Leptidis S, El Azzouzi H, Lok SI, et al. A deep sequencing approach to uncover the miRNOME in the human heart. *PLoS One* 2013;8(02):e57800
  - 33 Shen L, Song Y, Fu Y, Li P. MiR-29b mimics promotes cell apoptosis of smooth muscle cells via targeting on MMP-2. *Cytotechnology* 2018;70(01):351–359
  - 34 Yang F, Li H, Du Y, Shi Q, Zhao L. Downregulation of microRNA-34b is responsible for the elevation of blood pressure in spontaneously hypertensive rats. *Mol Med Rep* 2017;15(03):1031–1036
  - 35 Lin X, Li F, Xu F, et al. Aberration methylation of miR-34b was involved in regulating vascular calcification by targeting Notch1. *Aging (Albany NY)* 2019;11(10):3182–3197
  - 36 Gao ZF, Ji XL, Gu J, Wang XY, Ding L, Zhang H. microRNA-107 protects against inflammation and endoplasmic reticulum stress of vascular endothelial cells via KRT1-dependent Notch signaling pathway in a mouse model of coronary atherosclerosis. *J Cell Physiol* 2019;234(07):12029–12041
  - 37 Shen L, Hu Y, Lou J, et al. CircRNA-0044073 is upregulated in atherosclerosis and increases the proliferation and invasion of cells by targeting miR-107. *Mol Med Rep* 2019;19(05):3923–3932
  - 38 Liang X, Wang L, Wang M, et al. MicroRNA-124 inhibits macrophage cell apoptosis via targeting p38/MAPK signaling pathway in atherosclerosis development. *Aging (Albany NY)* 2020;12(13):13005–13022
  - 39 de Ronde MWJ, Kok MGM, Moerland PD, et al. High miR-124-3p expression identifies smoking individuals susceptible to atherosclerosis. *Atherosclerosis* 2017;263:377–384
  - 40 Shi Y, Xu X, Luan P, et al. miR-124-3p regulates angiogenesis in peripheral arterial disease by targeting STAT3. *Mol Med Rep* 2020;22(06):4890–4898
  - 41 Zhai C, Cong H, Hou K, et al. Effects of miR-124-3p regulation of the p38MAPK signaling pathway via MEKK3 on apoptosis and proliferation of macrophages in mice with coronary atherosclerosis. *Adv Clin Exp Med* 2020;29(07):803–812
  - 42 Choe N, Kwon JS, Kim JR, et al. The microRNA miR-132 targets Lrrfip1 to block vascular smooth muscle cell proliferation and neointimal hyperplasia. *Atherosclerosis* 2013;229(02):348–355
  - 43 Zhang L, Huang D, Wang Q, et al. MiR-132 inhibits expression of SIRT1 and induces pro-inflammatory processes of vascular endothelial inflammation through blockade of the SREBP-1c metabolic pathway. *Cardiovasc Drugs Ther* 2014;28(04):303–311
  - 44 Fu C, Yin D, Nie H, Sun D. Notoginsenoside R1 protects HUVEC against oxidized low density lipoprotein (Ox-LDL)-induced atherogenic response via down-regulating miR-132. *Cell Physiol Biochem* 2018;51(04):1739–1750
  - 45 Chen WJ, Chen YH, Hsu YJ, Lin KH, Yeh YH. MicroRNA-132 targeting PTEN contributes to cilostazol-promoted vascular smooth muscle cell differentiation. *Atherosclerosis* 2018;274:1–7
  - 46 Niespolo C, Johnston JM, Deshmukh SR, et al. Tribbles-1 expression and its function to control inflammatory cytokines, including interleukin-8 levels are regulated by miRNAs in macrophages and prostate cancer cells. *Front Immunol* 2020;11:574046
  - 47 Štrauskienė A, Navickas R, Laucevičius A, et al. Mir-1, miR-122, miR-132, and miR-133 are related to subclinical aortic atherosclerosis associated with metabolic syndrome. *Int J Environ Res Public Health* 2021;18(04):1483

- 48 Wang W, Li X, Ren L, Yuan C, Han Y, Wang Z. MiR-132 relieves vascular endothelial inflammation and improves endothelial function in atherosclerosis rats by regulating SIRT1. *Minerva Endocrinol* 2020;45(02):158–161
- 49 Zhao Y, Ponnusamy M, Zhang L, et al. The role of miR-214 in cardiovascular diseases. *Eur J Pharmacol* 2017;816:138–145
- 50 Lu HQ, Liang C, He ZQ, Fan M, Wu ZG. Circulating miR-214 is associated with the severity of coronary artery disease. *J Geriatr Cardiol* 2013;10(01):34–38
- 51 Wang H, Wei Z, Li H, et al. MiR-377-3p inhibits atherosclerosis-associated vascular smooth muscle cell proliferation and migration via targeting neuropilin2. *Biosci Rep* 2020;40(06):BSR20193425
- 52 Zhou J, Li L, Hu H, et al. Circ-HIPK2 accelerates cell apoptosis and autophagy in myocardial oxidative injury by sponging miR-485-5p and targeting ATG101. *J Cardiovasc Pharmacol* 2020;76(04):427–436
- 53 D'Alessandra Y, Carena MC, Spazzafumo L, et al. Diagnostic potential of plasmatic MicroRNA signatures in stable and unstable angina. *PLoS One* 2013;8(11):e80345
- 54 Wang C, Yang W, Liang X, et al. MicroRNA-761 modulates foam cell formation and inflammation through autophagy in the progression of atherosclerosis. *Mol Cell Biochem* 2020;474(1-2):135–146
- 55 Cho JR, Lee CY, Lee J, et al. MicroRNA-761 inhibits Angiotensin II-induced vascular smooth muscle cell proliferation and migration by targeting mammalian target of rapamycin. *Clin Hemorheol Microcirc* 2015;63(01):45–56
